# Supplementary material
Source: publisher figshare collection journal article supplement (https://tandf.figshare.com/ndownloader/files/21728238)
Supplement: Supplementary file 1 [file 21728238]

## Supplementary Material

### **Dynamic-mechanical thermoanalysis test as a high-performance alternative for accelerated freeze-thaw stability testing: A case study of O/W emulsions**

Nebojsa D. Cekic<sup>a,b,\*</sup>, Sanela M. Savic<sup>a</sup>, Snezana D. Savic<sup>c</sup>

<sup>a</sup> *DCP Hemigal, Leskovac, Serbia*

<sup>b</sup> *Faculty of Technology, University of Nis, Leskovac, Serbia*

<sup>c</sup> *Department of Pharmaceutical Technology and Cosmetology, Faculty of Pharmacy, University of Belgrade, Belgrade, Serbia*

**\*Corresponding author:** Nebojsa D. Cekic, DCP Hemigal, Tekstilna 97, 16000 Leskovac, Serbia; Faculty of Technology, University of Nis, Bulevar Oslobođenja 124, 16000 Leskovac, Serbia; E-mail: [nesafarm@gmail.com](mailto:nesafarm@gmail.com).

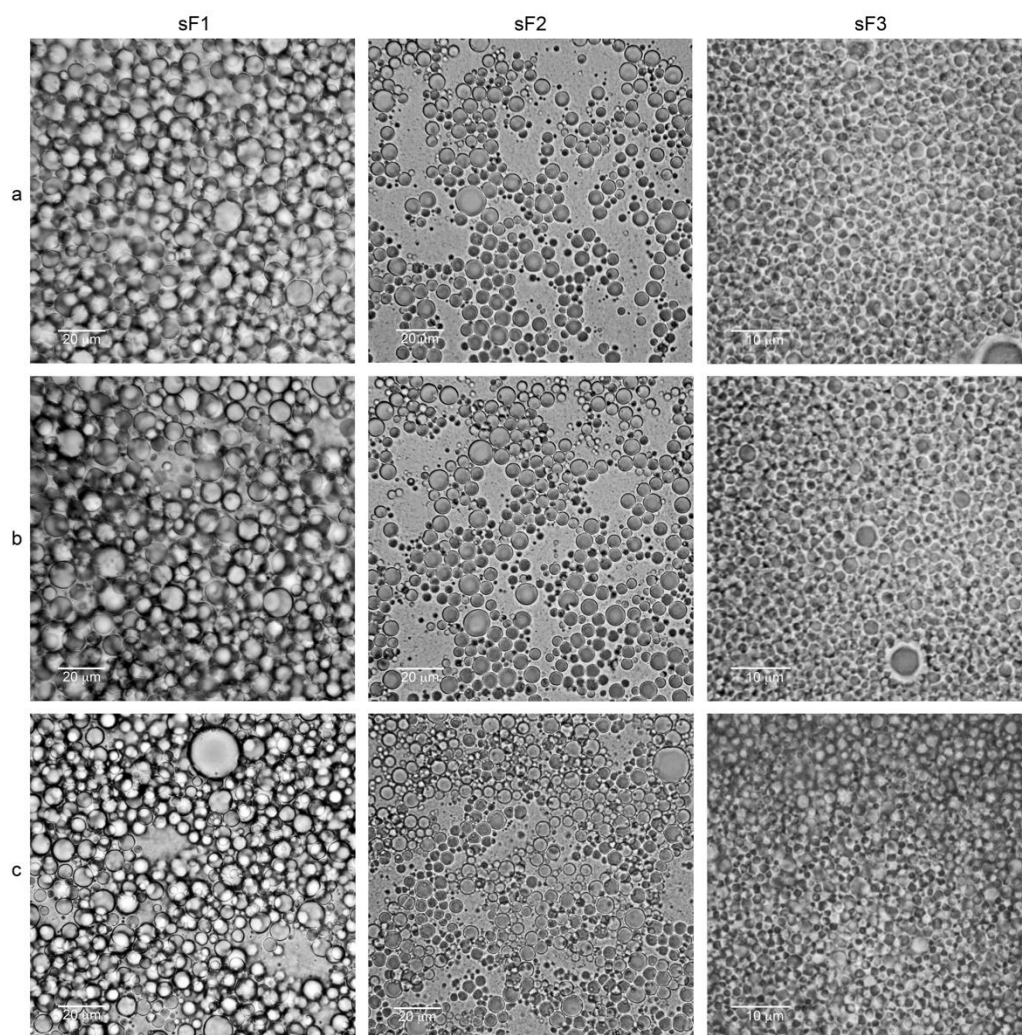

Fig. S1 Microphotographs of model emulsions sF1, sF2 and sF3, taken at time  $t_0$  (a), after last cycle of the freeze-thaw test in stability chamber (b) and after DMTA test using an air-bearing rheometer, in temperature range  $-5^{\circ}\text{C}$ – $45^{\circ}\text{C}$  (c)

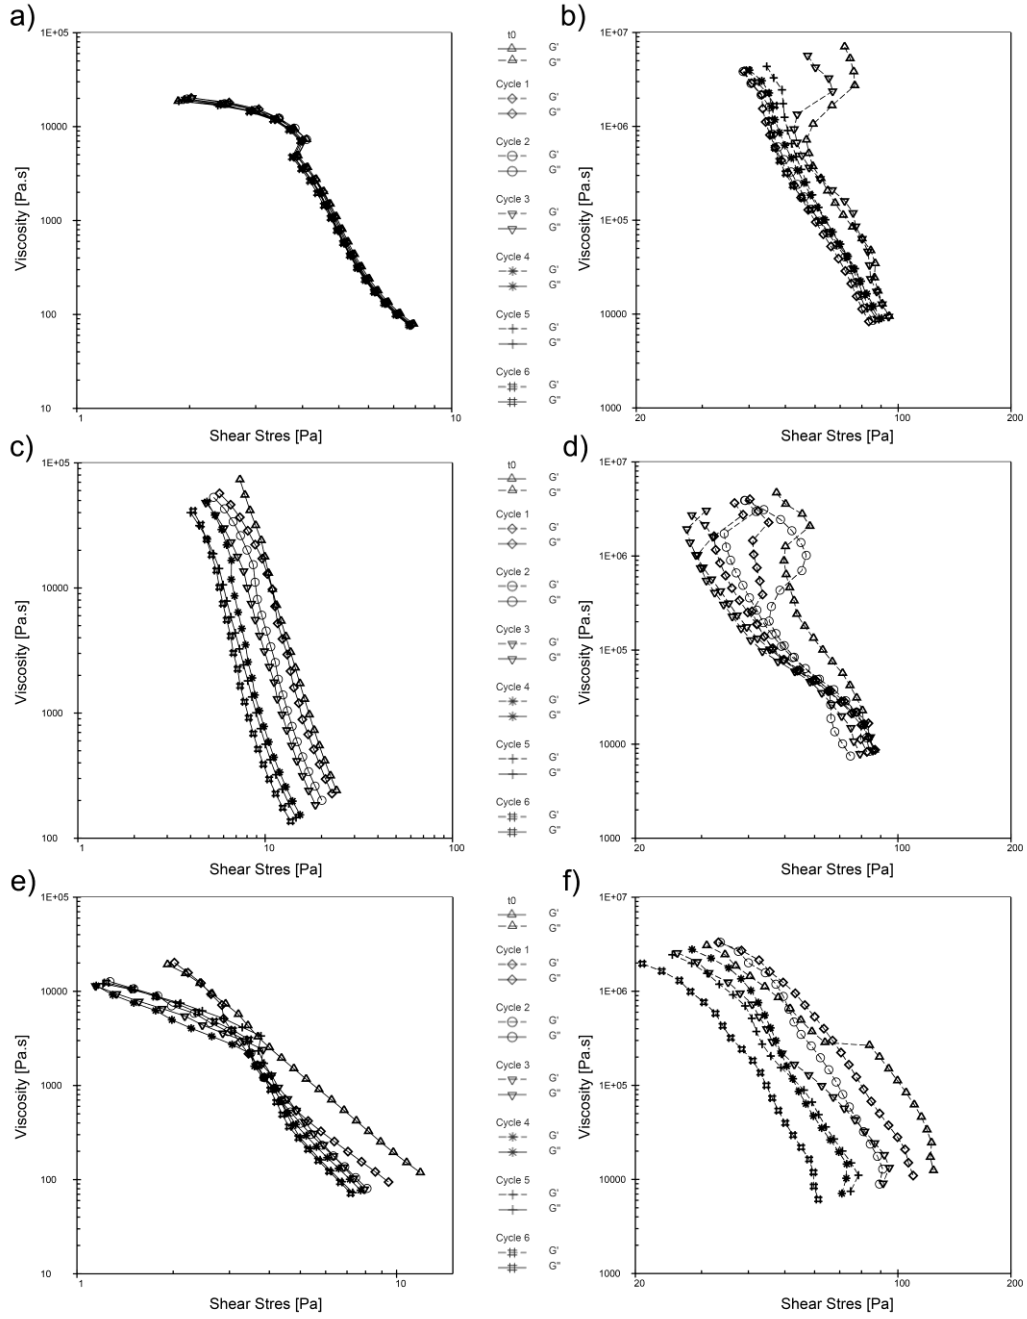

Fig. S2 Apparent viscosity plotted as a function of shear stress for fluid model emulsions fF1 (a), fF2 (c), fF3 (e), and for semisolid model emulsions sF1 (b), sF2 (d), sF3 (f)

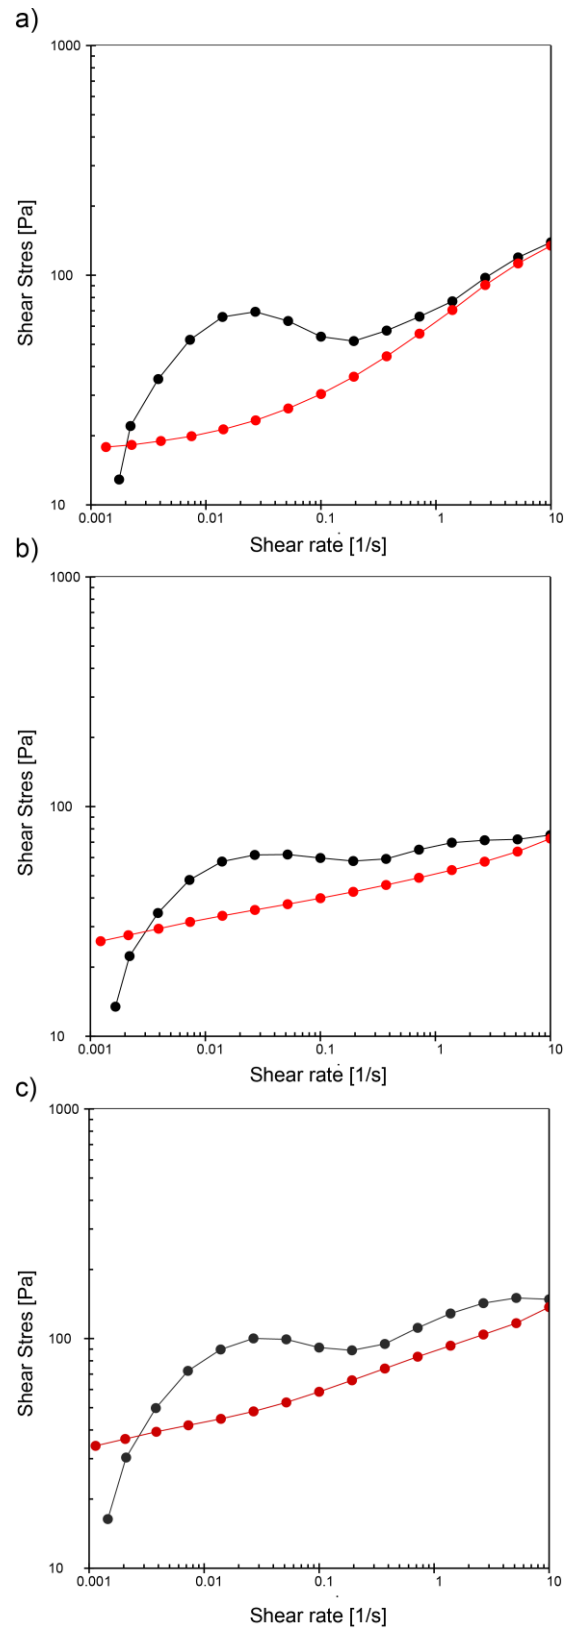

Fig. S3 Flow curves of semisolid model emulsions sF1 (a), sF2 (b) and sF3 (c) at increasing (black line and symbols) and decreasing (red line and symbols) shear stress, acquired with up-and-down shear rate ramps, with a data point every 12 seconds

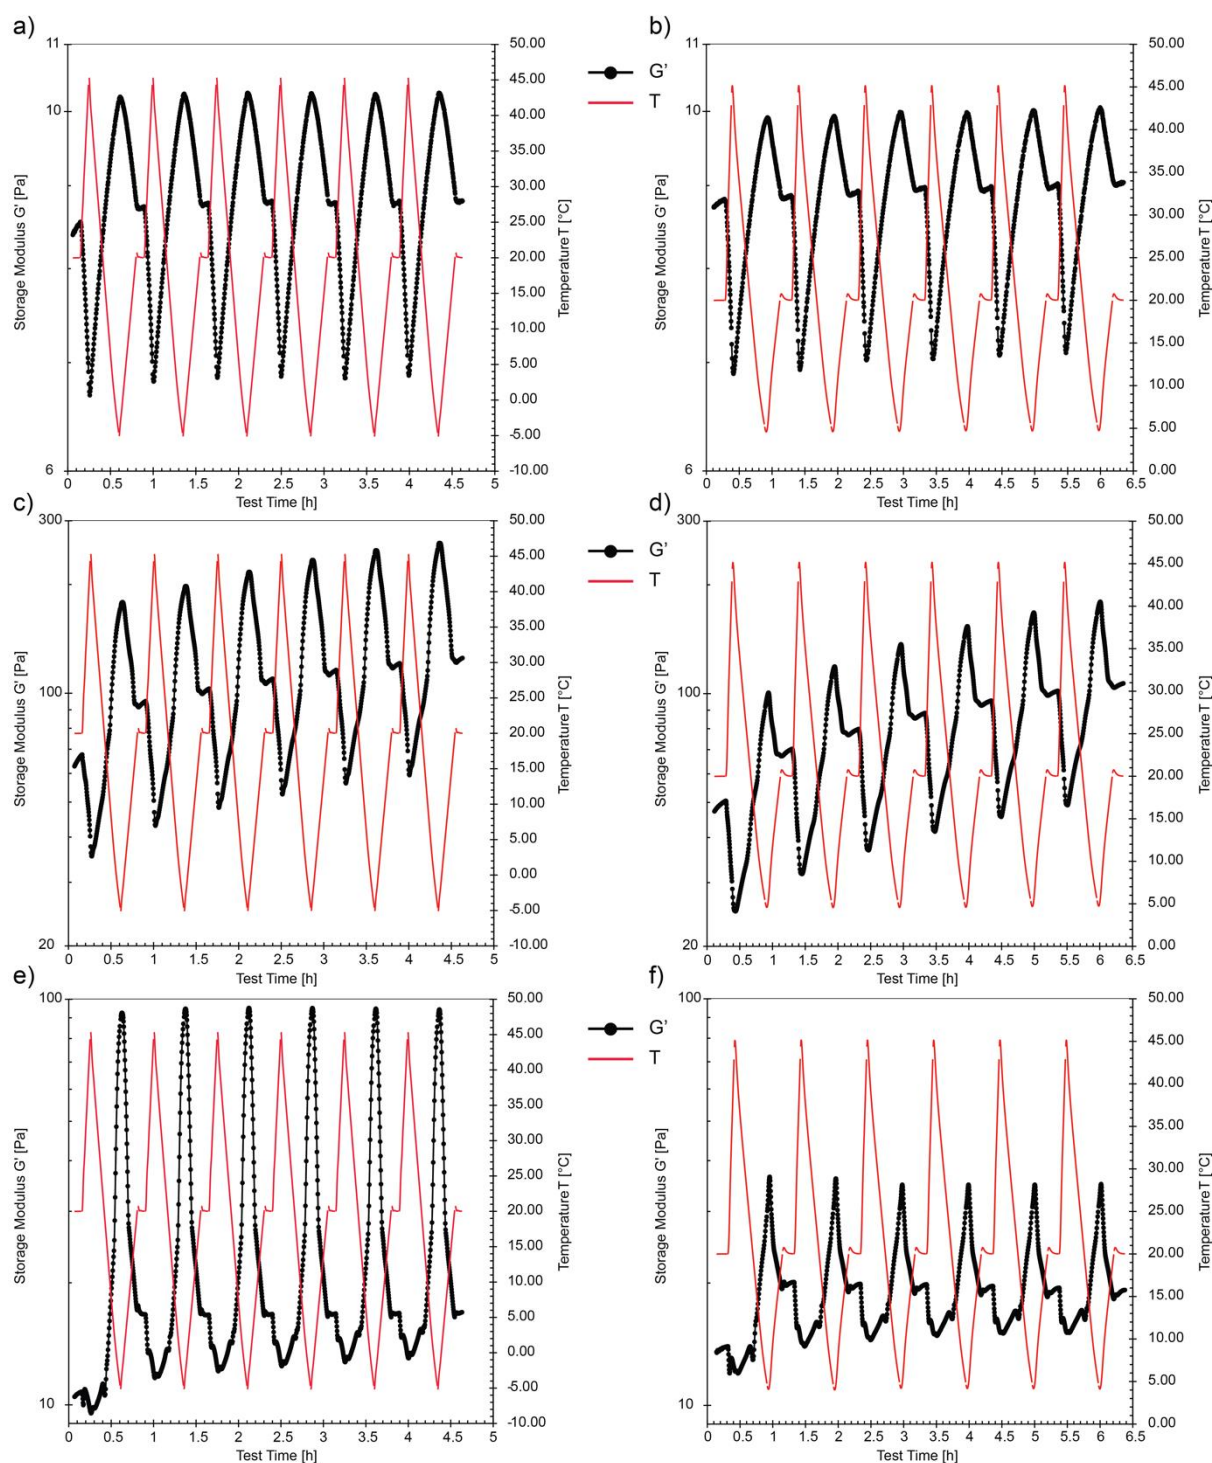

Fig. S4 Change of storage modulus ( $G'$ ) in dynamic-mechanical thermoanalysis (DMTA) test, in two temperature ranges being  $-5^{\circ}\text{C}$ – $45^{\circ}\text{C}$  (a, c, e) and  $5^{\circ}\text{C}$ – $45^{\circ}\text{C}$  (b, d, f), for fluid model emulsions ff1 (a, b), ff2 (c, d) and ff3 (e, f)

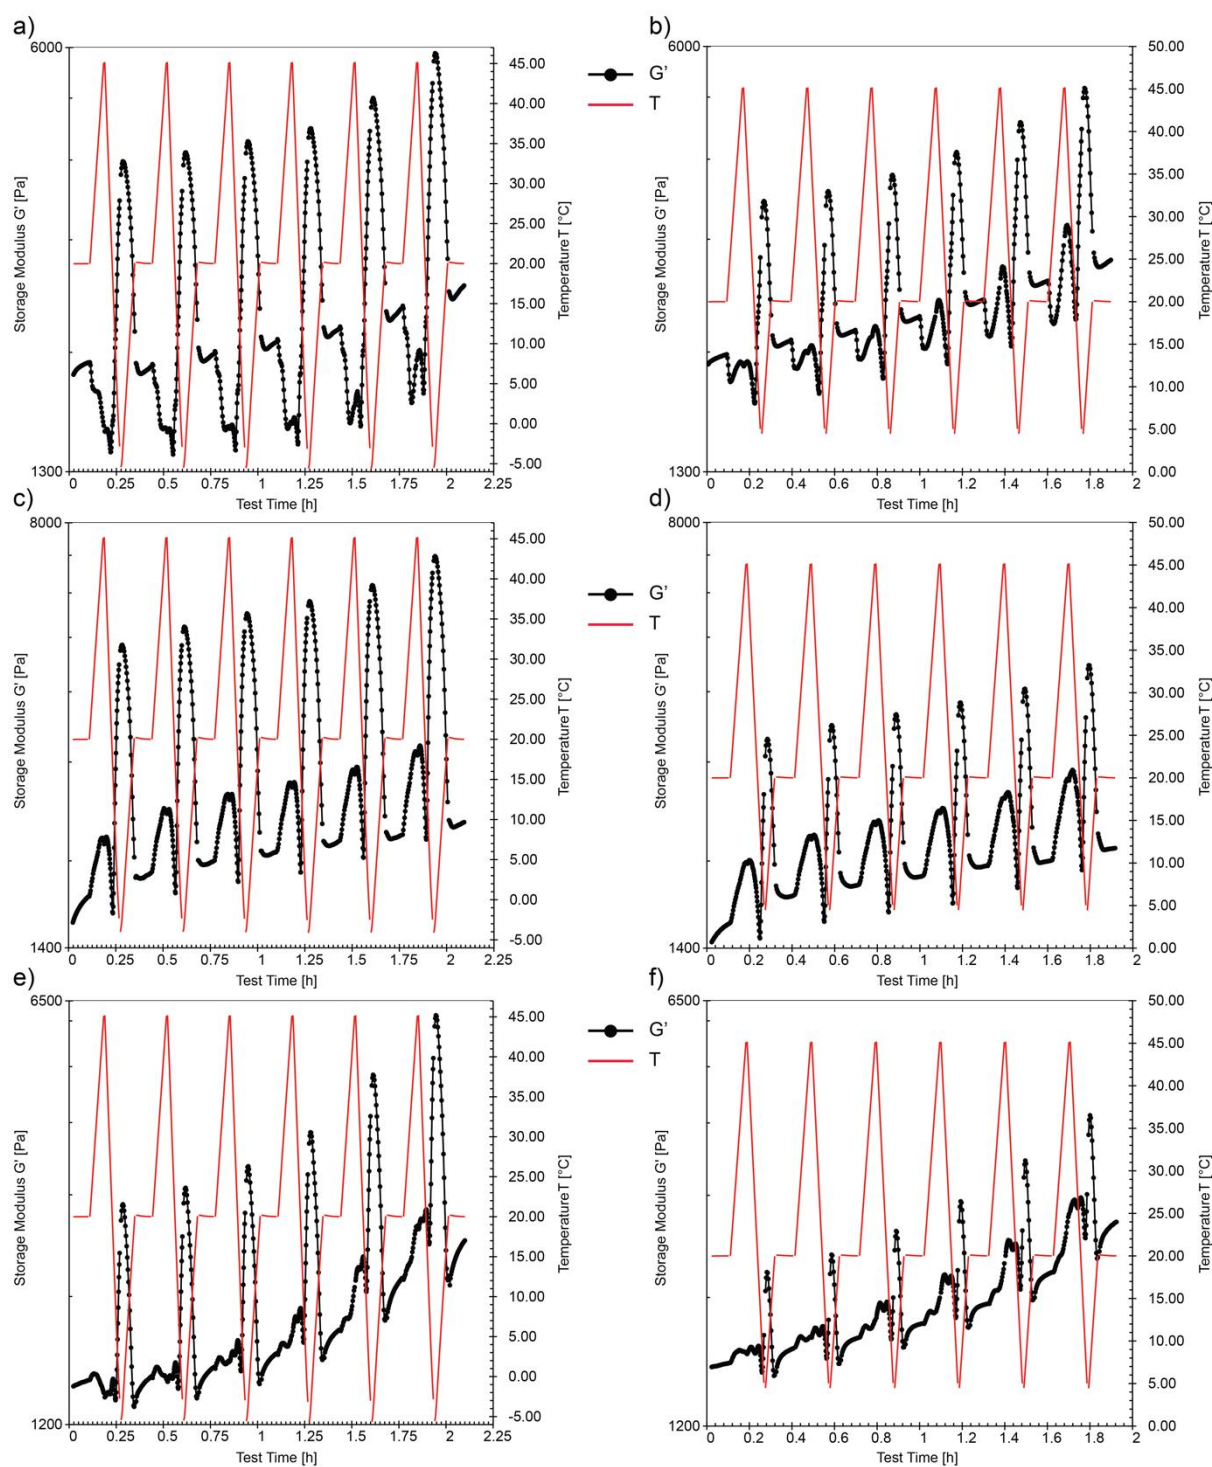

Fig. S5 Change of storage modulus ( $G'$ ) in dynamic-mechanical thermoanalysis (DMTA) test, in two temperature ranges being  $-5^{\circ}\text{C}$ – $45^{\circ}\text{C}$  (a, c, e) and  $5^{\circ}\text{C}$ – $45^{\circ}\text{C}$  (b, d, f), for semisolid model emulsions sF1 (a, b), sF2 (c, d) and sF3 (e, f)



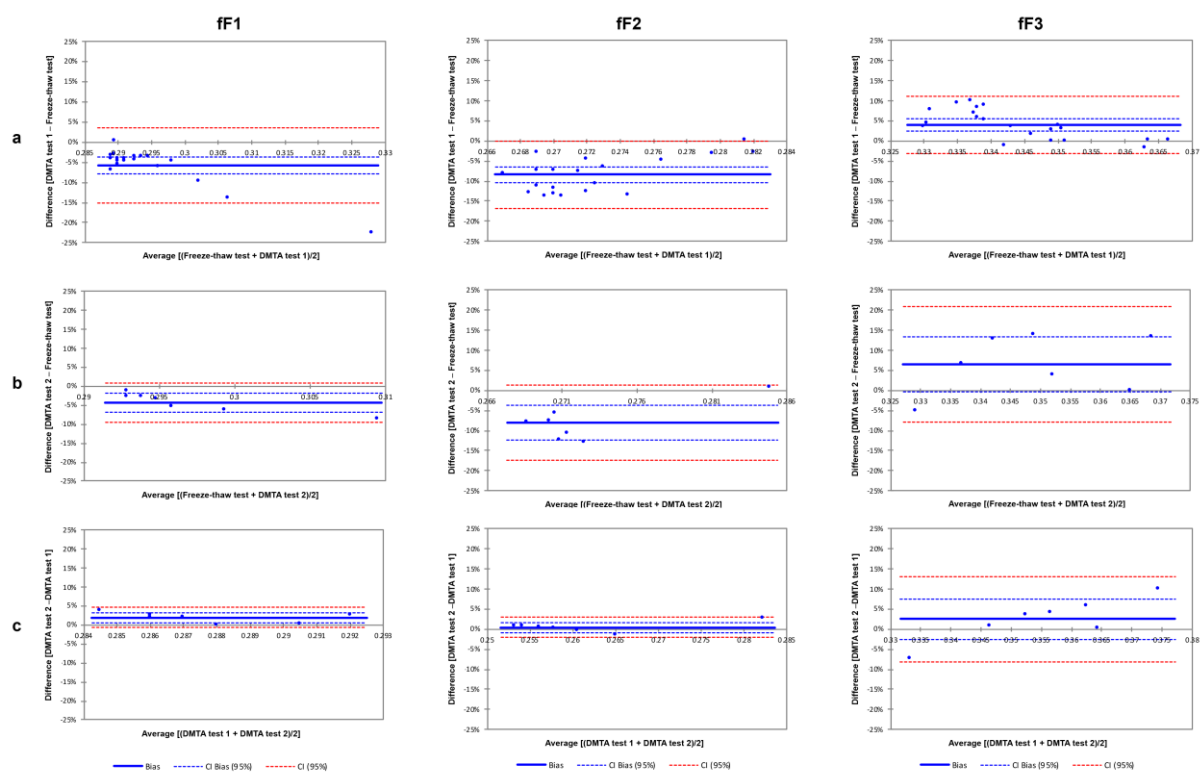

Fig. S6 Bland–Altman % difference plots of loss factor between DMTA test 1 and freeze-thaw test (a), DMTA test 2 and freeze-thaw test (b) and DMTA test 1 and DMTA test 2 (c) for three fluid model O/W emulsions (ff1, ff2 and ff3); blue solid line: bias; blue dashed line: confidence interval on the bias; red dashed line: confidence interval on the differences, i.e., limit of agreement

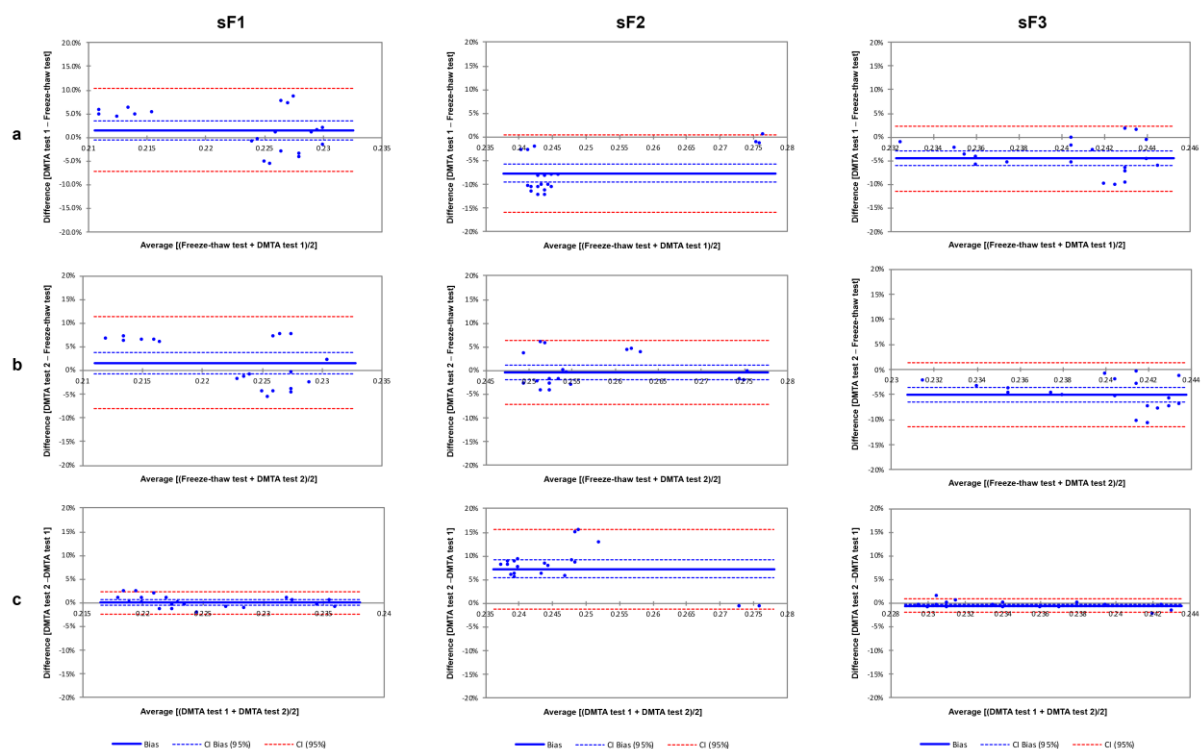

Fig. S7 Bland–Altman % difference plots of loss factor between DMTA test 1 and freeze-thaw test (a), DMTA test 2 and freeze-thaw test (b) and DMTA test 1 and DMTA test 2 (c) for three semisolid model O/W emulsions (sF1, sF2 and sF3); blue solid line: bias; blue dashed line: confidence interval on the bias; red dashed line: confidence interval on the differences, i.e., limit of agreement
